# Supplementary material for: Incidence, contributing factors and outcomes of birth injury among newborns in Africa: a systematic review of quantitative evidence protocol
Source: HighWire-hosted journal article supplement (doi:10.1136/bmjopen-2023-080262), 2024-03-01
Supplement: bmjopen-2023-080262supp003_data_supplement.pdf [file bmjopen-2023-080262supp003_data_supplement.pdf]

PRISMA 2020 flow diagram for new systematic reviews which included searches of databases, registers and other sources

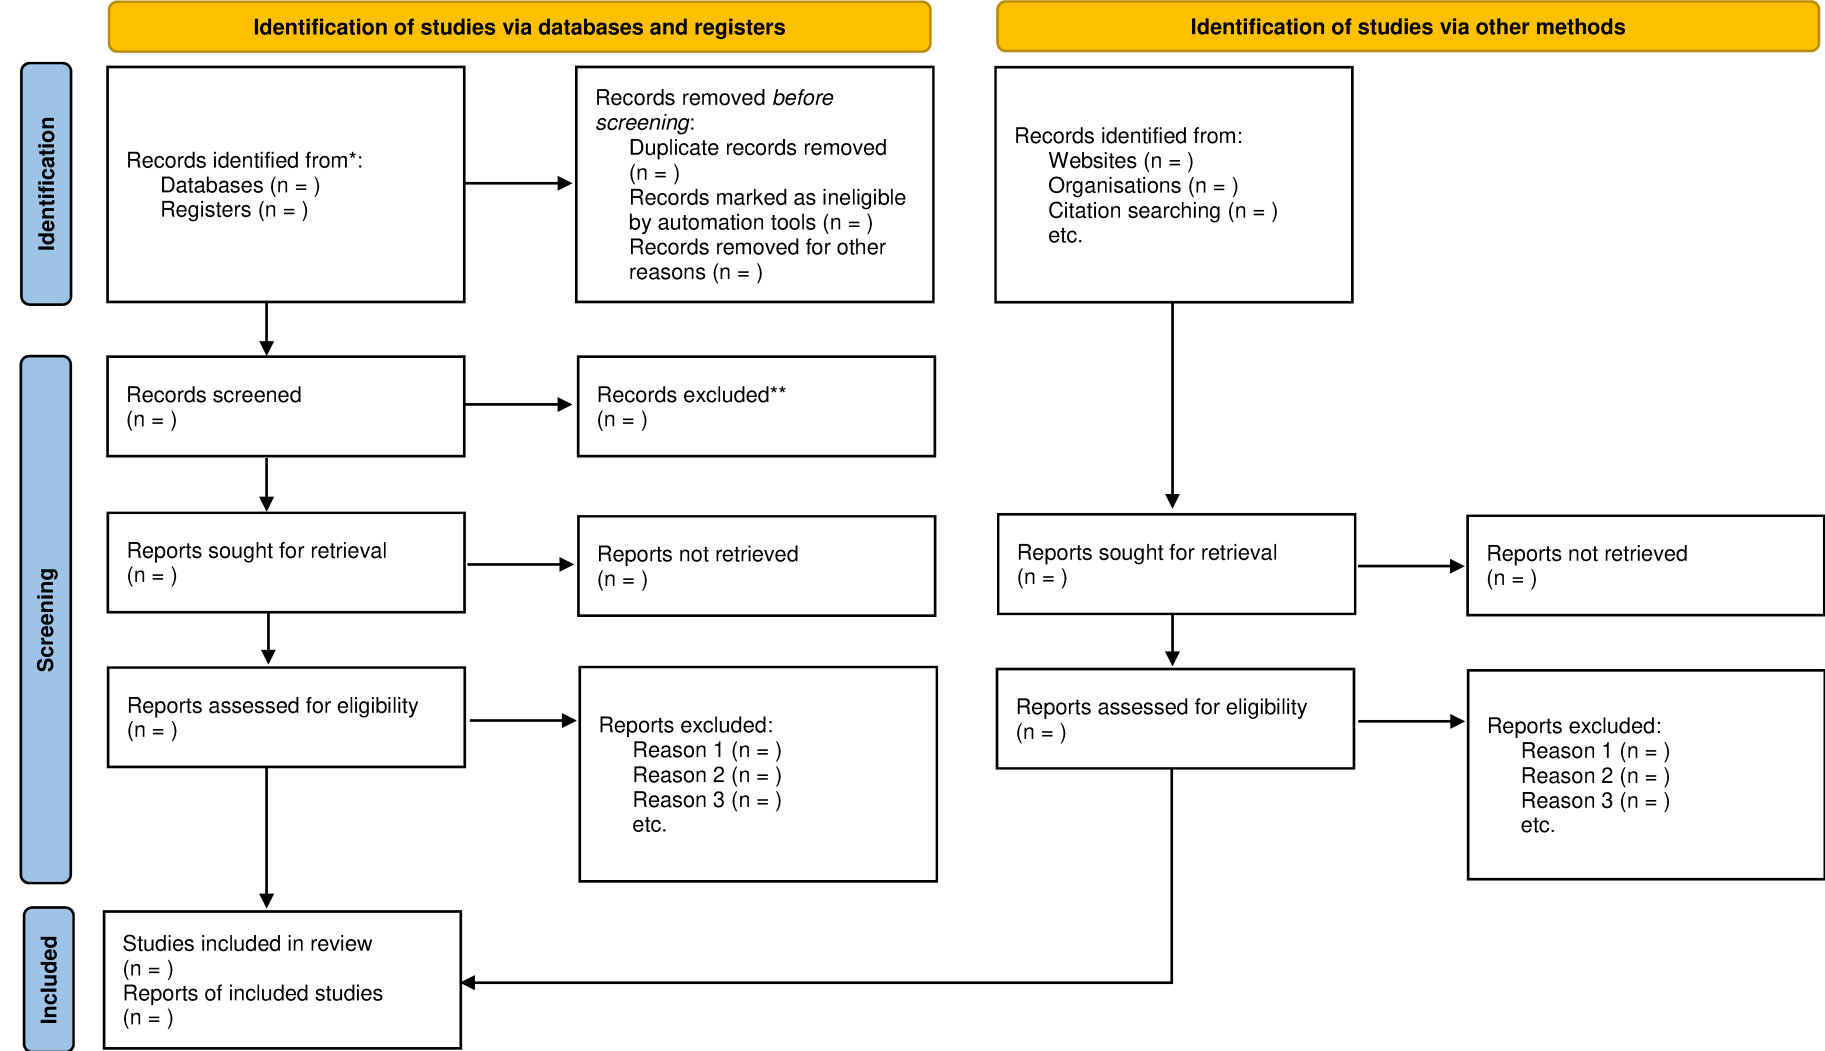

\*Consider, if feasible to do so, reporting the number of records identified from each database or register searched (rather than the total number across all databases/registers).  
\*\*If automation tools were used, indicate how many records were excluded by a human and how many were excluded by automation tools.
